# Supplementary material for: Transport Properties of Doped Wide Band Gap Layered Oxychalcogenide Semiconductors Sr2GaO3CuCh, Sr2ScO3CuCh, and Sr2InO3CuCh (Ch = S or Se)
Source: PubMed Central journal article supplement (PMC11603606; doi:10.1021/acs.chemmater.4c02760), 2024-11-14
Supplement: cm4c02760_si_001.pdf [file cm4c02760_si_001.pdf]

## Supplementary Information

# Transport properties of doped wide band gap layered oxychalcogenide semiconductors $\text{Sr}_2\text{GaO}_3\text{CuCh}$ , $\text{Sr}_2\text{ScO}_3\text{CuCh}$ and $\text{Sr}_2\text{InO}_3\text{CuCh}$ ( $\text{Ch} = \text{S}$ or $\text{Se}$ )

*Zahida Malik,<sup>1</sup> Liam Kemp,<sup>1</sup> Bastien F. Grosso,<sup>2</sup> Daniel W. Davies,<sup>3</sup> David O. Scanlon,<sup>2</sup> Geoffrey Hyett.<sup>1\*</sup>*

<sup>1</sup> School of Chemistry, Faculty of Engineering and Physical Sciences, Highfield Campus,  
University of Southampton, SO17 1BJ, UK

<sup>2</sup> School of Chemistry, University of Birmingham, Edgbaston, Birmingham, B15 2TT, UK

<sup>3</sup> Department of Chemistry, University College London, London, WC1H 0AJ, UK

**Section A: Rietveld refinement fits to X-ray diffraction data for all six  $\text{Sr}_2\text{MO}_3\text{CuCh}$  materials**

**Section B: Tables comparing our refined structural models to prior literature, where available**

**Section C. Full structural details of all six  $\text{Sr}_2\text{MO}_3\text{CuCh}$  compounds, derived from samples and diffraction data prepared for this work**

**Section D. Rietveld refinement fits and summary for sodium and potassium doped  $\text{A}_{0.05}\text{Sr}_{1.95}\text{MO}_3\text{CuCh}$  samples**

Section A: Rietveld refinement fits to X-ray diffraction data for all six  $\text{Sr}_2\text{MO}_3\text{CuCh}$  materials

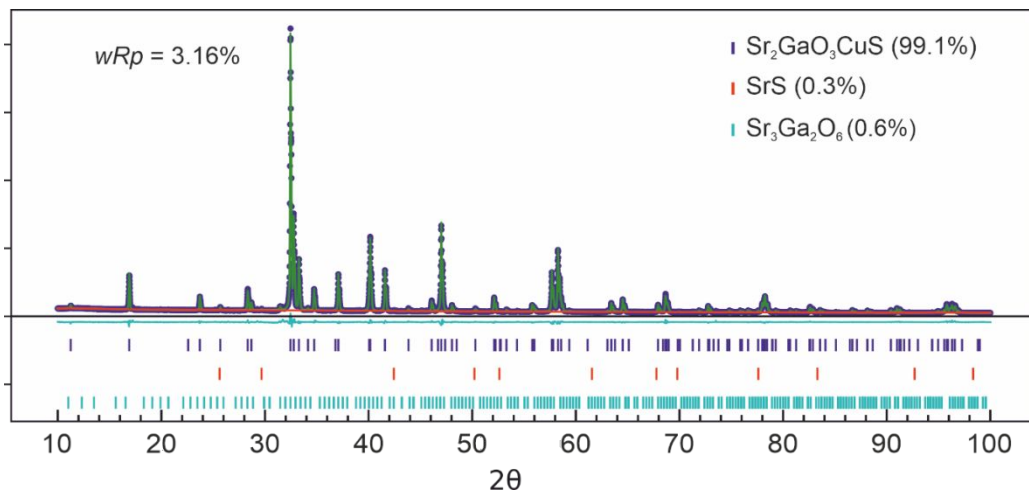

Figure S1. Rietveld refinement of  $\text{Sr}_2\text{GaO}_3\text{CuS}$ , data in blue, refinement fit in green.

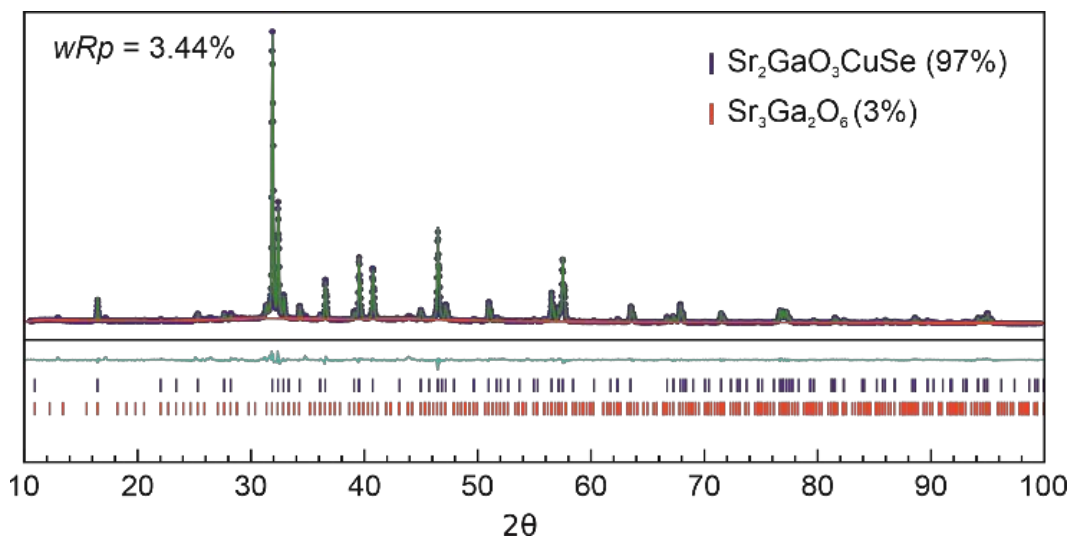

Figure S2. Rietveld refinement of  $\text{Sr}_2\text{GaO}_3\text{CuSe}$ , data in blue, refinement fit in green.

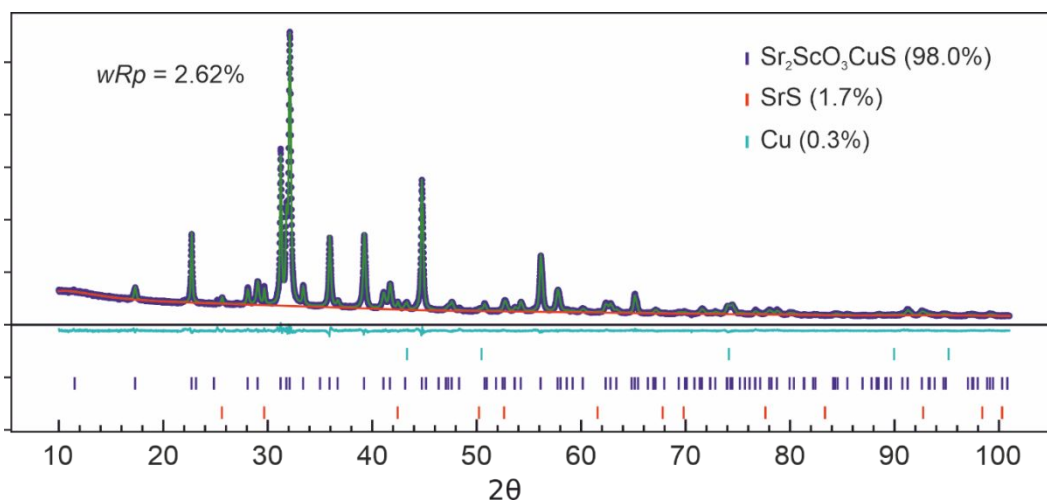

Figure S3. Rietveld refinement of  $\text{Sr}_2\text{ScO}_3\text{CuS}$ , data in blue, refinement fit in green.

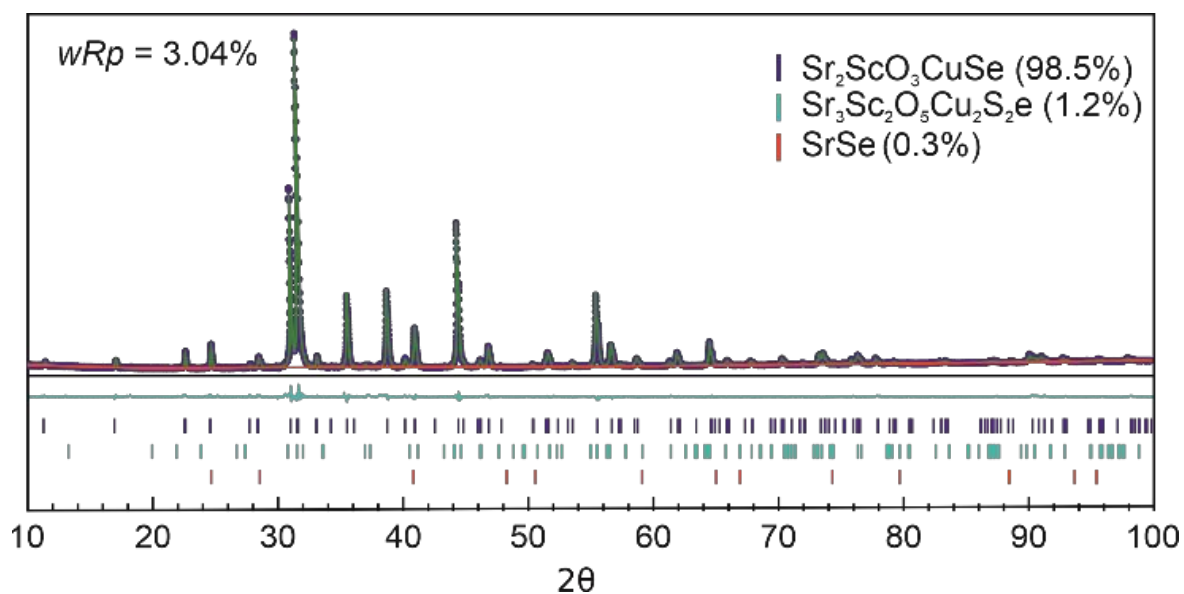

Figure S4. Rietveld refinement of  $\text{Sr}_2\text{ScO}_3\text{CuSe}$ , data in blue, refinement fit in green.

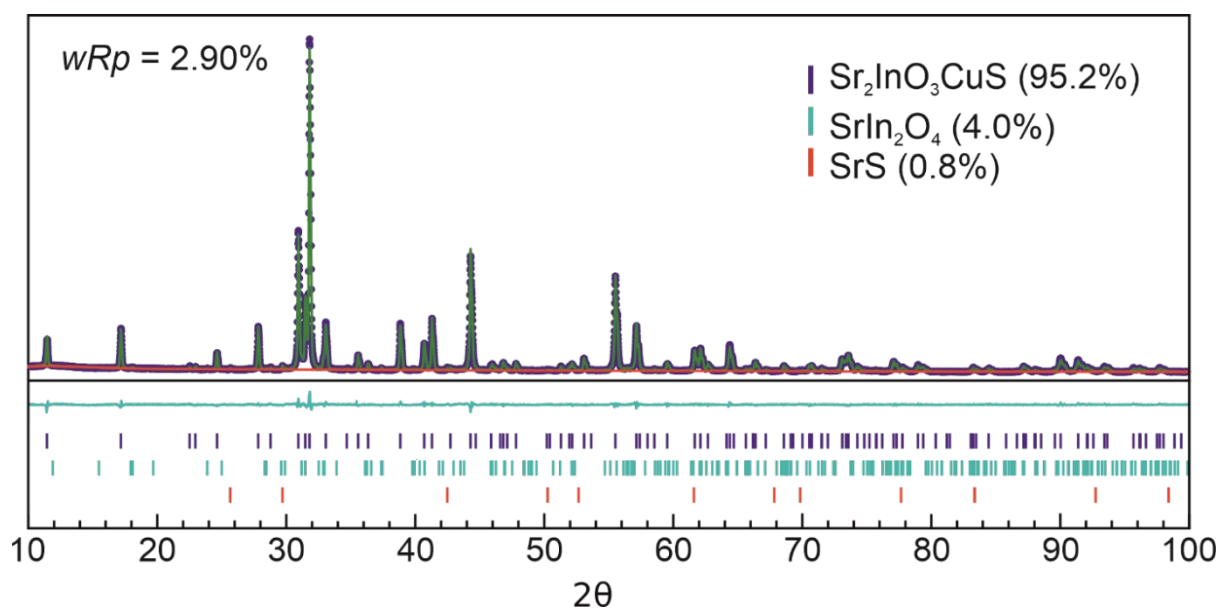

Figure S5. Rietveld refinement of  $\text{Sr}_2\text{InO}_3\text{CuS}$ , data in blue, refinement fit in green.

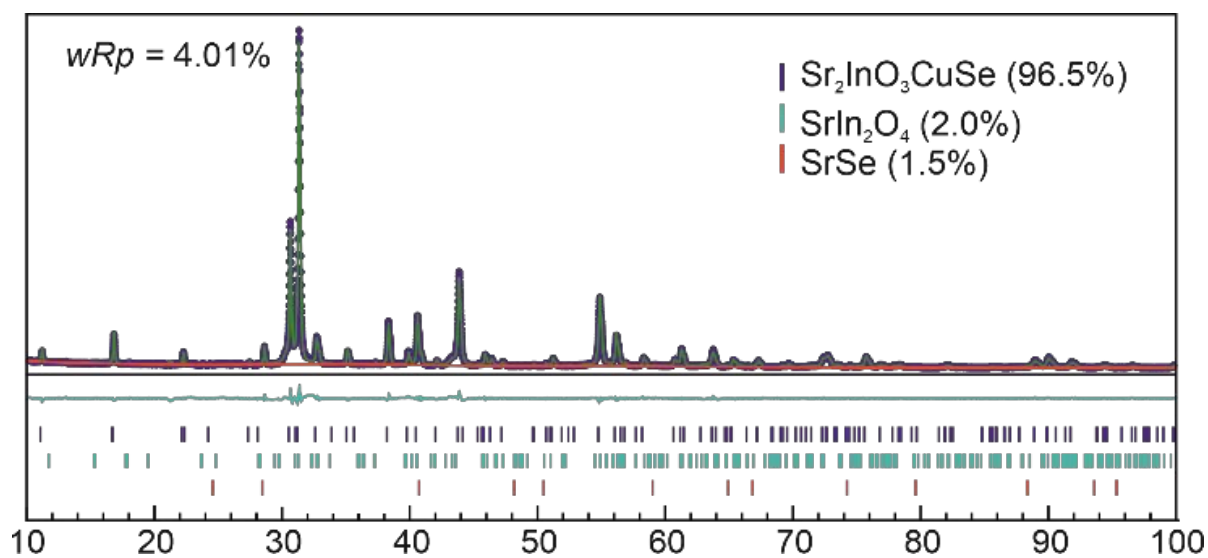

Figure S6. Rietveld refinement of Sr<sub>2</sub>InO<sub>3</sub>CuSe, data in blue, refinement fit in green.

|                                | Sr <sub>2</sub> Ga <sub>2</sub> O <sub>3</sub> CuS, This work | Sr <sub>2</sub> Ga <sub>2</sub> O <sub>3</sub> CuS, from reference 1 |
|--------------------------------|---------------------------------------------------------------|----------------------------------------------------------------------|
| Lattice parameter <i>a</i> / Å | 3.864026(13)                                                  | 3.8606(4)                                                            |
| Lattice parameter <i>c</i> / Å | 15.74911(6)                                                   | 15.730(2)                                                            |
| Data Points                    | 8887                                                          | N/A                                                                  |
| Reflections (main phase)       | 104                                                           | N/A                                                                  |
| Parameters                     | 46                                                            | N/A                                                                  |
| Purity                         | 99.1                                                          | N/A                                                                  |
| wRp                            | 3.156                                                         | 6.14                                                                 |
| R <sub>f</sub> <sup>2</sup>    | 1.818                                                         | 3.12                                                                 |
| GoF                            | 2.28                                                          | 1.11                                                                 |
| Sr1 (0.75, 0.75, <i>z</i> )    | 0.18435(5)                                                    | 0.1842(2)                                                            |
| Sr2 (0.75, 0.75, <i>z</i> )    | 0.41401(5)                                                    | 0.4140(1)                                                            |
| Ga (0.25, 0.25, <i>z</i> )     | 0.31210(7)                                                    | 0.3144(2)                                                            |
| O1 (0.25, 0.75, <i>z</i> )     | 0.28940(16)                                                   | 0.2899(4)                                                            |
| O2 (0.25, 0.25, <i>z</i> )     | 0.42975(22)                                                   | 0.4270(6)                                                            |
| Cu (0.25, 0.75, <i>z</i> )     | 0                                                             | 0                                                                    |
| S (0.25, 0.25, <i>z</i> )      | 0.09413(15)                                                   | 0.0940(3)                                                            |

**Section B: Tables comparing our refined structural models to prior literature, where available**

Table S1. Comparison of our refined model of Sr<sub>3</sub>GaO<sub>3</sub>CuS to prior literature data.

|                                | Sr <sub>2</sub> ScO <sub>3</sub> CuS, this work | Sr <sub>2</sub> ScO <sub>3</sub> CuS, from reference 2 |
|--------------------------------|-------------------------------------------------|--------------------------------------------------------|
| Lattice parameter <i>a</i> / Å | 4.04780(4)                                      | 4.045                                                  |
| Lattice parameter <i>c</i> / Å | 15.37012(20)                                    | 15.359                                                 |
| Data Points                    | 8985                                            | N/A                                                    |
| Reflections (main phase)       | 111                                             | N/A                                                    |
| Parameters                     | 44                                              | N/A                                                    |
| Purity                         | 98%                                             | N/A                                                    |
| wRp                            | 2.617                                           | 7.54                                                   |
| R <sub>f</sub> <sup>2</sup>    | 2.476                                           | 2.88                                                   |
| GoF                            | 1.61                                            | N/A                                                    |
| Sr1 (0.75, 0.75, <i>z</i> )    | 0.17947(5)                                      | 0.181                                                  |
| Sr2 (0.75, 0.75, <i>z</i> )    | 0.41286(5)                                      | 0.415                                                  |
| Sc (0.25, 0.25, <i>z</i> )     | 0.30250(14)                                     | 0.305                                                  |
| O1 (0.25, 0.75, <i>z</i> )     | 0.28218(22)                                     | 0.283                                                  |
| O2 (0.25, 0.25, <i>z</i> )     | 0.43048(27)                                     | 0.429                                                  |
| Cu (0.25, 0.75, <i>z</i> )     | 0                                               | 0                                                      |
| S (0.25, 0.25, <i>z</i> )      | 0.08830(13)                                     | 0.09                                                   |

Table S2. Comparison of our refined model of Sr<sub>3</sub>ScO<sub>3</sub>CuS to prior literature data.

|                                | Sr <sub>2</sub> InO <sub>3</sub> CuS, this work | Sr <sub>2</sub> InO <sub>3</sub> CuS, from reference 3 |
|--------------------------------|-------------------------------------------------|--------------------------------------------------------|
| Lattice parameter <i>a</i> / Å | 4.092392 (20)                                   | 4.092009(38)                                           |
| Lattice parameter <i>c</i> / Å | 15.52813 (9)                                    | 15.51559(19)                                           |
| Data Points                    | 8887                                            | N/A                                                    |
| Reflections (main phase)       | 111                                             | N/A                                                    |
| Parameters                     | 43                                              | N/A                                                    |
| Purity                         | 95.2%                                           | 100%                                                   |
| wRp                            | 2.81                                            | 6.28                                                   |
| R <sub>f</sub> <sup>2</sup>    | 1.86                                            | 3.39                                                   |
| GoF                            | 2.09                                            | 1.85                                                   |
| Sr1 (0.75, 0.75, <i>z</i> )    | 0.17706(5)                                      | 0.17598(19)                                            |
| Sr2 (0.75, 0.75, <i>z</i> )    | 0.41351(5)                                      | 0.41390(17)                                            |
| In (0.25, 0.25, <i>z</i> )     | 0.30135(5)                                      | 0.30163(13)                                            |
| O1 (0.25, 0.75, <i>z</i> )     | 0.27842(18)                                     | 0.28362(74)                                            |
| O2 (0.25, 0.25, <i>z</i> )     | 0.4401(3)                                       | 0.4451(12)                                             |
| Cu (0.25, 0.75, <i>z</i> )     | 0                                               | 0                                                      |
| S (0.25, 0.25, <i>z</i> )      | 0.08644(11)                                     | 0.08496(47)                                            |

Table S3. Comparison of the refined model of Sr<sub>3</sub>InO<sub>2</sub>CuS to prior literature data.

|                                | Sr <sub>2</sub> InO <sub>3</sub> CuSe, this work | Sr <sub>2</sub> InO <sub>3</sub> CuSe from reference 3 <sup>3</sup> |
|--------------------------------|--------------------------------------------------|---------------------------------------------------------------------|
| Lattice parameter <i>a</i> / Å | 4.12638(4)                                       | 4.125381(91)                                                        |
| Lattice parameter <i>c</i> / Å | 15.82112(18)                                     | 15.81973(46)                                                        |
| Data Points                    | 8887                                             | N/A                                                                 |
| Reflections (main phase)       | 115                                              | N/A                                                                 |
| Parameters                     | 51                                               | N/A                                                                 |
| Purity                         | 96.5%                                            | 93.6%                                                               |
| wRp                            | 4.01                                             | 5.53                                                                |
| R <sub>f</sub> <sup>2</sup>    | 4.15                                             | 3.72                                                                |
| GoF                            | 3.07                                             | 1.48                                                                |
| Sr1 (0.75, 0.75, <i>z</i> )    | 0.18483(16)                                      | 0.18464(24)                                                         |
| Sr2 (0.75, 0.75, <i>z</i> )    | 0.41576(14)                                      | 0.41492(20)                                                         |
| In (0.25, 0.25, <i>z</i> )     | 0.30547(15)                                      | .30504(22)                                                          |
| O1 (0.25, 0.75, <i>z</i> )     | 0.2843(4)                                        | 0.28354(86)                                                         |
| O2 (0.25, 0.25, <i>z</i> )     | 0.4397(7)                                        | 0.4409(14)                                                          |
| Cu (0.25, 0.75, <i>z</i> )     | 0                                                | 0                                                                   |
| Se (0.25, 0.25, <i>z</i> )     | 0.09303(17)                                      | 0.09114(30)                                                         |

Table S4. Comparison of the refined model of Sr<sub>3</sub>InO<sub>2</sub>CuSe to prior literature data.

**Section C. Full structural details of all six  $Sr_2MO_3CuCh$  compounds, derived from samples and diffraction data prepared for this work**

| Atom Site | x    | y    | z           | Uiso ( $\text{\AA}^2$ ) |
|-----------|------|------|-------------|-------------------------|
| Sr1       | 0.75 | 0.75 | 0.18435(5)  | 0.02885(27)             |
| Sr2       | 0.75 | 0.75 | 0.41401(5)  | 0.02931(26)             |
| Ga        | 0.25 | 0.25 | 0.31210(7)  | 0.02741(29)             |
| O1        | 0.25 | 0.75 | 0.28940(16) | 0.0571(11)              |
| O2        | 0.25 | 0.25 | 0.42975(22) | 0.0366(13)              |
| Cu        | 0.25 | 0.75 | 0           | 0.0387(4)               |
| S         | 0.25 | 0.25 | 0.09413(15) | 0.0296(6)               |

Table S5. Structural parameters of the refined model of  $Sr_2GaO_3CuS$ . Sample refined in the  $P4/nmm$  space group, with  $a = 3.864023(13) \text{\AA}$ ,  $c = 15.74911(6) \text{\AA}$ ,  $vol = 235.145(2) \text{\AA}^3$ ,  $GOF = 2.28$ ,  $Wrp = 3.16\%$  and  $R_f^2 = 1.82\%$  for 46 variables at room temperature.

| Atom Site | x    | y    | z           | Uiso ( $\text{\AA}^2$ ) |
|-----------|------|------|-------------|-------------------------|
| Sr1       | 0.75 | 0.75 | 0.17947(5)  | 0.0563(5)               |
| Sr2       | 0.75 | 0.75 | 0.41286(5)  | 0.0553(5)               |
| Sc        | 0.25 | 0.25 | 0.30250(14) | 0.0430(5)               |
| O1        | 0.25 | 0.75 | 0.28218(22) | 0.0919(14)              |
| O2        | 0.25 | 0.25 | 0.43048(27) | 0.0430(14)              |
| Cu        | 0.25 | 0.75 | 0           | 0.0785(6)               |
| S         | 0.25 | 0.25 | 0.08830(13) | 0.0593(9)               |

Table S6. Structural parameters of the refined model of  $Sr_2ScO_3CuS$ . Sample refined in the  $P4/nmm$  space group, with  $a = 4.04780(4) \text{\AA}$ ,  $c = 15.37012(20) \text{\AA}$ ,  $vol = 251.835(6) \text{\AA}^3$ ,  $GOF = 1.61$ ,  $Wrp = 2.62\%$  and  $R_f^2 = 2.48\%$  for 46 variables at room temperature.

| Atom Site | x    | y    | z           | Uiso ( $\text{\AA}^2$ ) |
|-----------|------|------|-------------|-------------------------|
| Sr1       | 0.75 | 0.75 | 0.17706(5)  | 0.0110(4)               |
| Sr2       | 0.75 | 0.75 | 0.41351(5)  | 0.0183(4)               |
| In        | 0.25 | 0.25 | 0.30135(5)  | 0.00804(26)             |
| O1        | 0.25 | 0.75 | 0.27842(18) | 0.0272(12)              |
| O2        | 0.25 | 0.25 | 0.4401(3)   | 0.0467(15)              |
| Cu        | 0.25 | 0.75 | 0           | 0.0234(4)               |
| S         | 0.25 | 0.25 | 0.08644(11) | 0.0094(8)               |

Table S7. Structural parameters of the refined model of  $Sr_2InO_3CuS$ . Sample refined in the  $P4/nmm$  space group, with  $a = 4.092392(20) \text{\AA}$ ,  $c = 15.52813(9) \text{\AA}$ ,  $vol = 260.060(3) \text{\AA}^3$ ,  $GOF = 2.09$ ,  $Wrp = 2.811\%$  and  $R_f^2 = 1.857\%$  for 43 variables at room temperature.

| Atom Site | x    | y    | z           | Uiso (Å <sup>2</sup> ) |
|-----------|------|------|-------------|------------------------|
| Sr1       | 0.75 | 0.75 | 0.19312(13) | 0.0284(7)              |
| Sr2       | 0.75 | 0.75 | 0.41598(11) | 0.0323(9)              |
| In        | 0.25 | 0.25 | 0.31667(14) | 0.0275(10)             |
| O1        | 0.25 | 0.75 | 0.2923(4)   | 0.0367(25)             |
| O2        | 0.25 | 0.25 | 0.4334(6)   | 0.052(4)               |
| Cu        | 0.25 | 0.75 | 0           | 0.0395(10)             |
| Se        | 0.25 | 0.25 | 0.09785(12) | 0.0268(9)              |

Table S8. Structural parameters of the refined model of Sr<sub>2</sub>GaO<sub>3</sub>CuSe. Sample refined in the *P4/nmm* space group, with a = 3.89988(4) Å, c = 16.09379(17) Å, vol = 244.771(6) Å<sup>3</sup>, GOF = 3.72, Wrp = 3.30% and R<sub>f</sub><sup>2</sup>=2.704% for 48 variables at room temperature.

| Atom Site | x    | y    | z           | Uiso (Å <sup>2</sup> ) |
|-----------|------|------|-------------|------------------------|
| Sr1       | 0.75 | 0.75 | 0.18840(9)  | 0.0449(4)              |
| Sr2       | 0.75 | 0.75 | 0.41500(7)  | 0.0431(4)              |
| Sc        | 0.25 | 0.25 | 0.30730(18) | 0.0344(6)              |
| O1        | 0.25 | 0.75 | 0.28796(23) | 0.0731(16)             |
| O2        | 0.25 | 0.25 | 0.43136(28) | 0.0636(19)             |
| Cu        | 0.25 | 0.75 | 0           | 0.0567(5)              |
| Se        | 0.25 | 0.25 | 0.09413(9)  | 0.0465(5)              |

Table S9. Structural parameters of the refined model of Sr<sub>2</sub>ScO<sub>3</sub>CuSe. Sample refined in the *P4/nmm* space group, with a = 4.076704(24) Å, c = 15.70839(13) Å, vol = 261.065(4) Å<sup>3</sup>, GOF = 2.25, Wrp = 3.23% and R<sub>f</sub><sup>2</sup>=3.017% for 37 variables at room temperature.

| Atom Site | x    | y    | z           | Uiso (Å <sup>2</sup> ) |
|-----------|------|------|-------------|------------------------|
| Sr1       | 0.75 | 0.75 | 0.18483(16) | 0.0224(8)              |
| Sr2       | 0.75 | 0.75 | 0.41576(14) | 0.0396(10)             |
| In        | 0.25 | 0.25 | 0.30547(15) | 0.0247(6)              |
| O1        | 0.25 | 0.75 | 0.2843(4)   | 0.0619(31)             |
| O2        | 0.25 | 0.25 | 0.4397(7)   | 0.066(4)               |
| Cu        | 0.25 | 0.75 | 0           | 0.0363(9)              |
| Se        | 0.25 | 0.25 | 0.09303(17) | 0.0211(9)              |

Table S10. Structural parameters of the refined model of Sr<sub>2</sub>InO<sub>3</sub>CuSe. Sample refined in the *P4/nmm* space group, with a = 4.12638(4) Å, c = 15.82112(18) Å, vol = 269.386(6) Å<sup>3</sup>, GOF = 3.07, Wrp = 4.01% and R<sub>f</sub><sup>2</sup>=4.153% for 51 variables at room temperature.

| Bond / angle                 | Sr <sub>2</sub> GaO <sub>3</sub> CuS | Sr <sub>2</sub> ScO <sub>3</sub> CuS | Sr <sub>2</sub> InO <sub>3</sub> CuS | Sr <sub>2</sub> GaO <sub>3</sub> CuSe | Sr <sub>2</sub> ScO <sub>3</sub> CuSe | Sr <sub>2</sub> InO <sub>3</sub> CuSe |
|------------------------------|--------------------------------------|--------------------------------------|--------------------------------------|---------------------------------------|---------------------------------------|---------------------------------------|
| <i>M</i> -O1 eq / Å          | 1.96481(50)                          | 2.04786(61)                          | 2.07694(50)                          | 1.9890(13)                            | 2.06087(68)                           | 2.0902(11)                            |
| <i>M</i> -O2 ax / Å          | 1.8529(36)                           | 1.9671(47)                           | 2.1545(47)                           | 1.8786(99)                            | 1.9488(52)                            | 2.124(11)                             |
| <i>M</i> - <i>X</i> / Å      | 3.4328(26)                           | 3.2923(29)                           | 3.3372(19)                           | 3.5216(30)                            | 3.3486(32)                            | 3.3610(36)                            |
| O1- <i>B</i> -O2 / °         | 100.484(87)                          | 98.77(12)                            | 99.871(87)                           | 101.37(22)                            | 98.48(13)                             | 99.22(20)                             |
| <i>M</i> O5 block / Å        | 2.2104(43)                           | 2.2794(54)                           | 2.5106(54)                           | 2.271(12)                             | 2.2526(57)                            | 2.459(13)                             |
| Sr1-O1 / Å                   | 2.5436(17)                           | 2.5668(21)                           | 2.5815(18)                           | 2.5199(43)                            | 2.5692(24)                            | 2.5949(41)                            |
|                              |                                      |                                      |                                      |                                       |                                       |                                       |
| Sr1- <i>X</i> / Å            | 3.0797(11)                           | 3.18684(94)                          | 3.21775(82)                          | 3.1552(14)                            | 3.24077(91)                           | 3.2593(16)                            |
| O1- <i>A</i> 1- <i>X</i> / ° | 79.839(42)                           | 76.684(44)                           | 76.266(37)                           | 80.188(85)                            | 77.240(48)                            | 76.523(83)                            |
| Sr1 Block / Å                | 3.0753(35)                           | 2.9800(39)                           | 2.9811(33)                           | 3.1294(67)                            | 3.0448(39)                            | 3.0261(69)                            |
| Sr2-O2 eq / Å                | 2.74350(32)                          | 2.87501(40)                          | 2.92307(67)                          | 2.77185(99)                           | 2.89410(40)                           | 2.9423(15)                            |
| Sr2-O2-ax / Å                | 2.4606(36)                           | 2.4079(42)                           | 2.2732(47)                           | 2.4240(98)                            | 2.4134(45)                            | 2.287(11)                             |
| Sr2 Block / Å                | 1.1064(35)                           | 1.0685(42)                           | 0.9301(47)                           | 1.0718(97)                            | 1.0782(44)                            | 0.954(11)                             |
| Cu- <i>X</i> / Å             | 2.4352(14)                           | 2.4368(11)                           | 2.44715(94)                          | 2.5064(12)                            | 2.51818(83)                           | 2.5344(16)                            |
| <i>X</i> -Cu- <i>X</i> / °   | 105.001(72)                          | 112.310(61)                          | 113.472(51)                          | 102.151(58)                           | 108.085(42)                           | 108.993(79)                           |
| CuCh block / Å               | 2.9649(33)                           | 2.7144(28)                           | 2.6845(24)                           | 3.1496(27)                            | 2.9573(20)                            | 2.9437(38)                            |

Table S11. Summary of all major bond angles, bond lengths and 'block' heights for the Sr<sub>2</sub>MO<sub>3</sub>CuCh phases, where *M* = Sc, Ga or In, and *Ch* = S or Se. Graphical representation of the location of the different atom sites (eg. Sr1, Sr2) and 'blocks' please refer to figure 2 in the main paper.



Section D. Rietveld refinement fits and summary for sodium and potassium doped  $A_{0.05}Sr_{1.95}MO_3CuCh$  samples

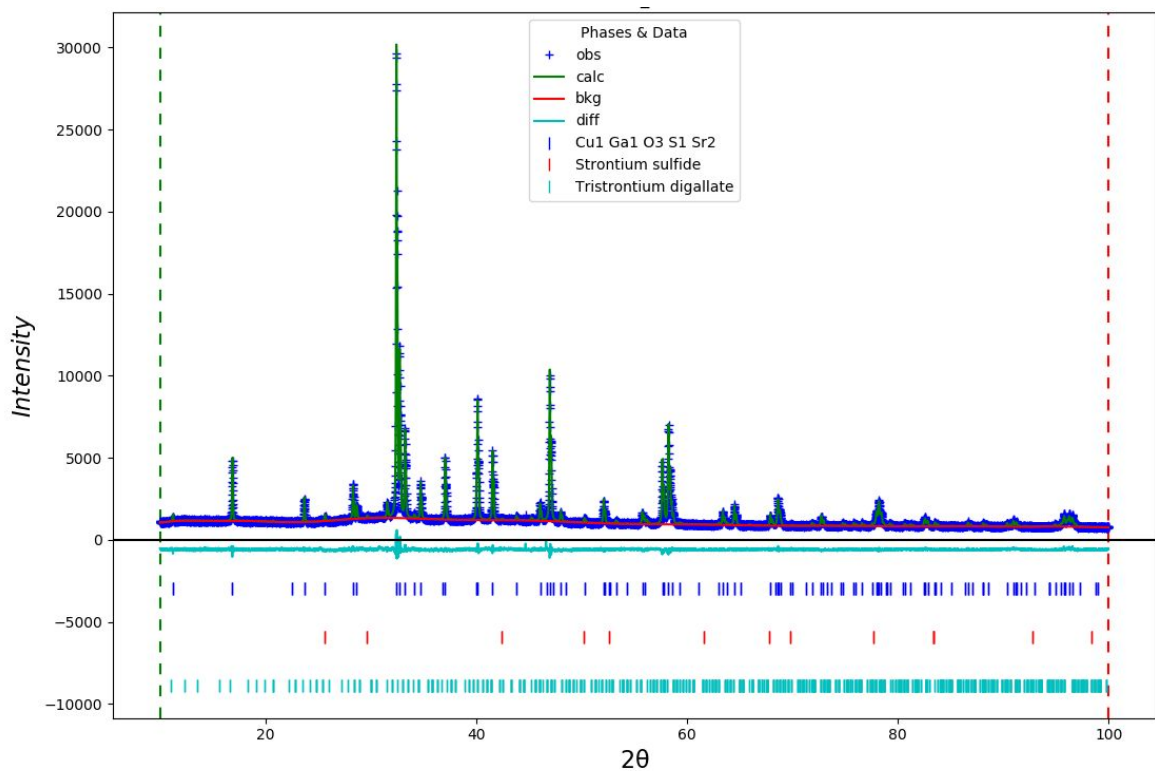

Figure S7. Refinement of sodium doped nominal  $Na_{0.05}Sr_{1.95}GaO_3CuS$

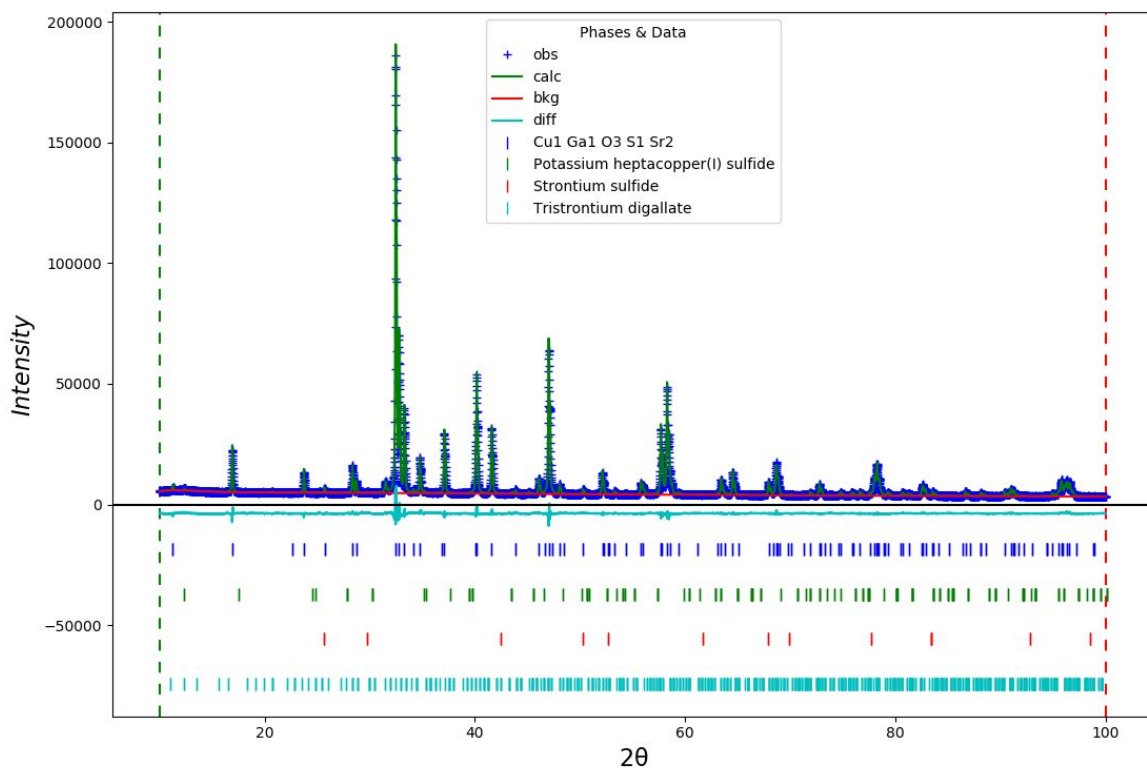

Figure S8. Refinement of potassium doped nominal  $K_{0.05}Sr_{1.95}GaO_3CuS$



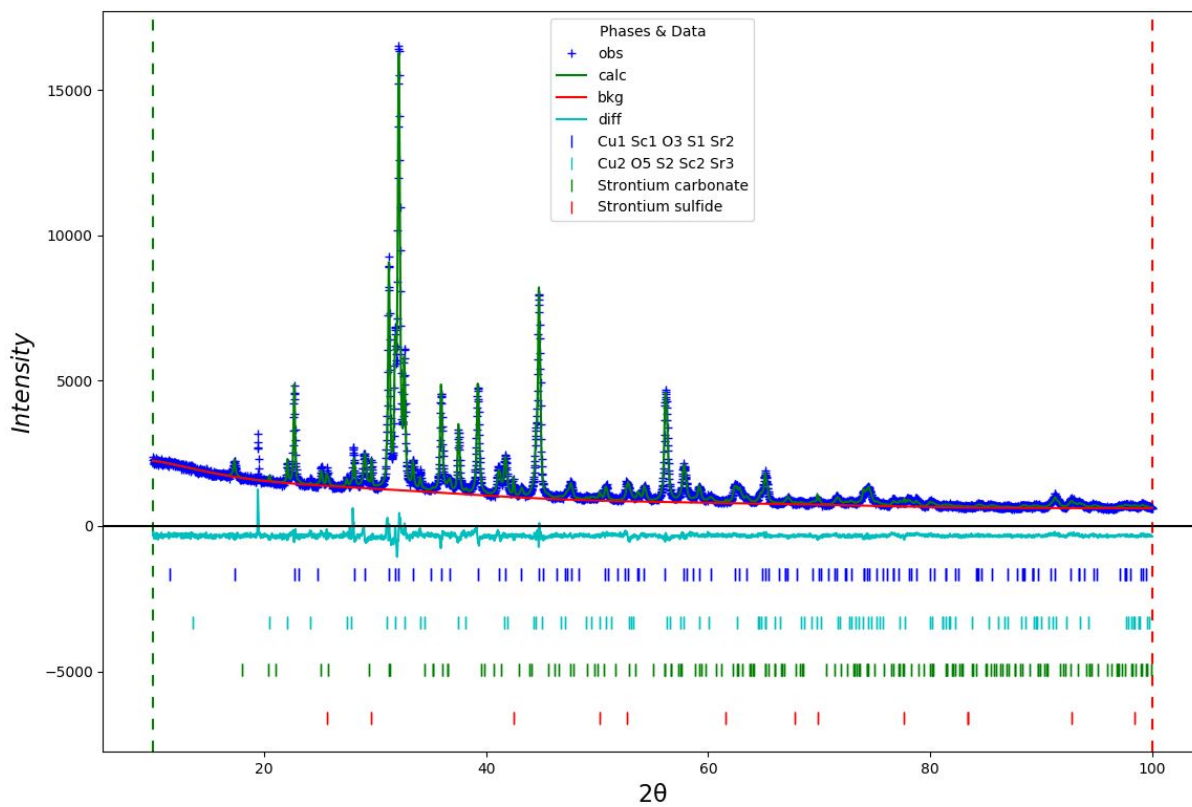

Figure S9. Refinement of sodium doped nominal  $\text{Na}_{0.05}\text{Sr}_{1.95}\text{ScO}_3\text{CuS}$

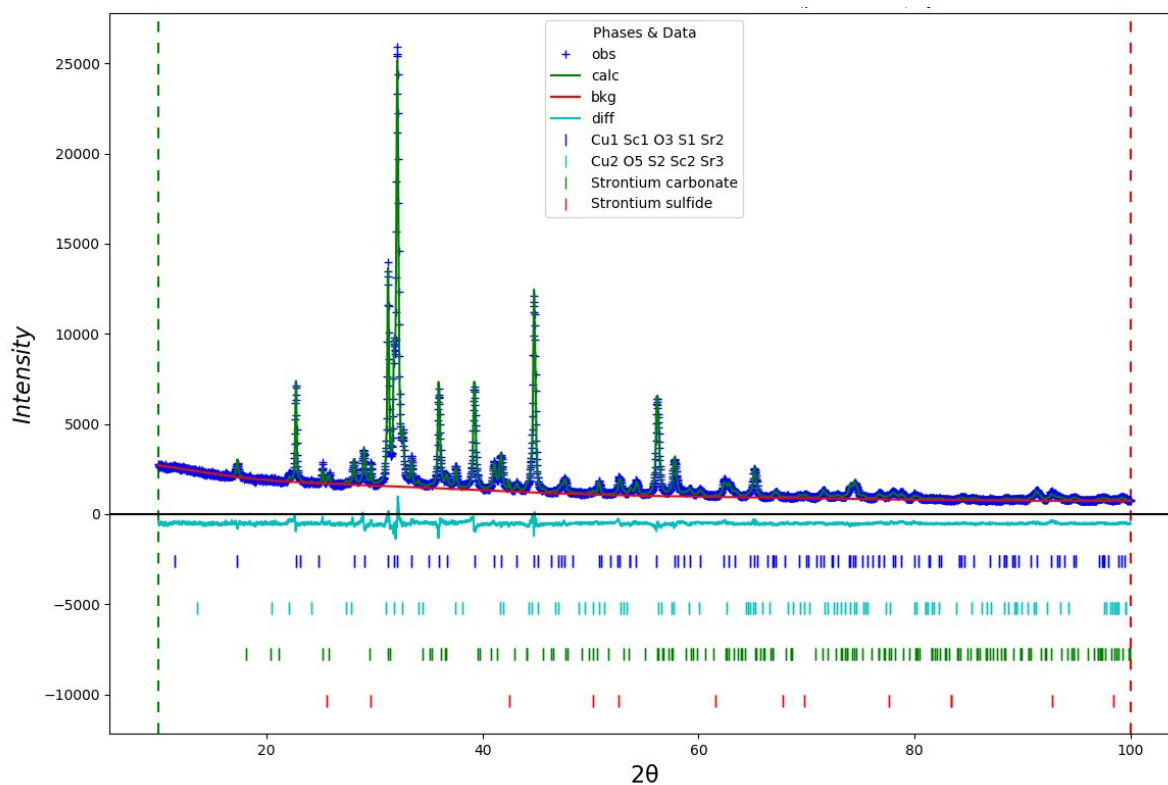

Figure S10. Refinement of potassium doped nominal  $\text{K}_{0.05}\text{Sr}_{1.95}\text{ScO}_3\text{CuS}$

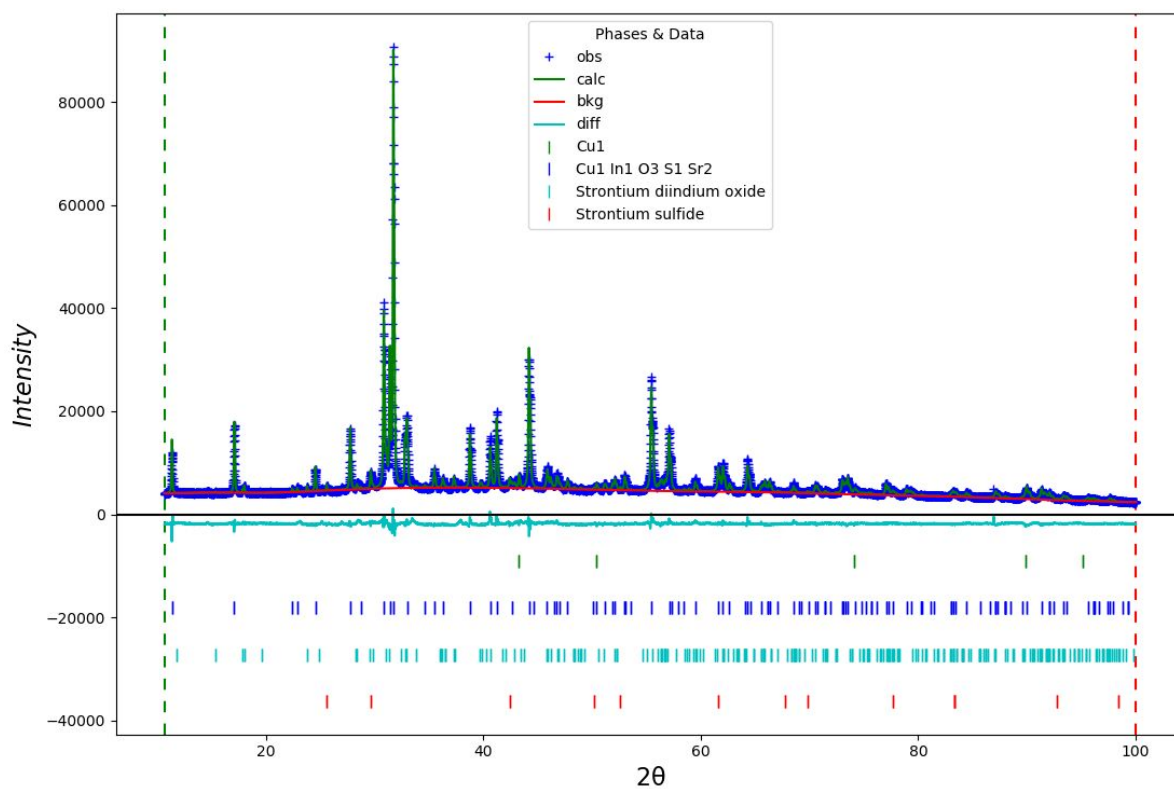

Figure S11. Refinement of sodium doped nominal  $\text{Na}_{0.05}\text{Sr}_{1.95}\text{InO}_3\text{CuS}$

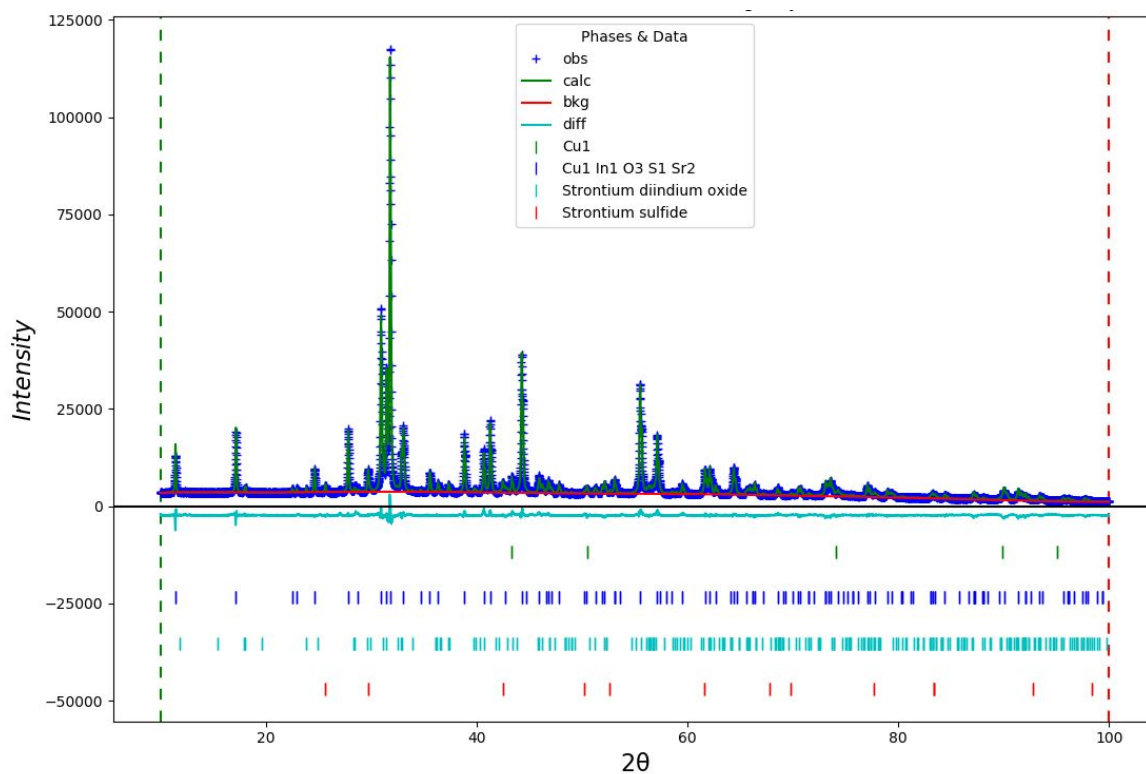

Figure S12. Refinement of potassium doped nominal  $\text{K}_{0.05}\text{Sr}_{1.95}\text{InO}_3\text{CuS}$

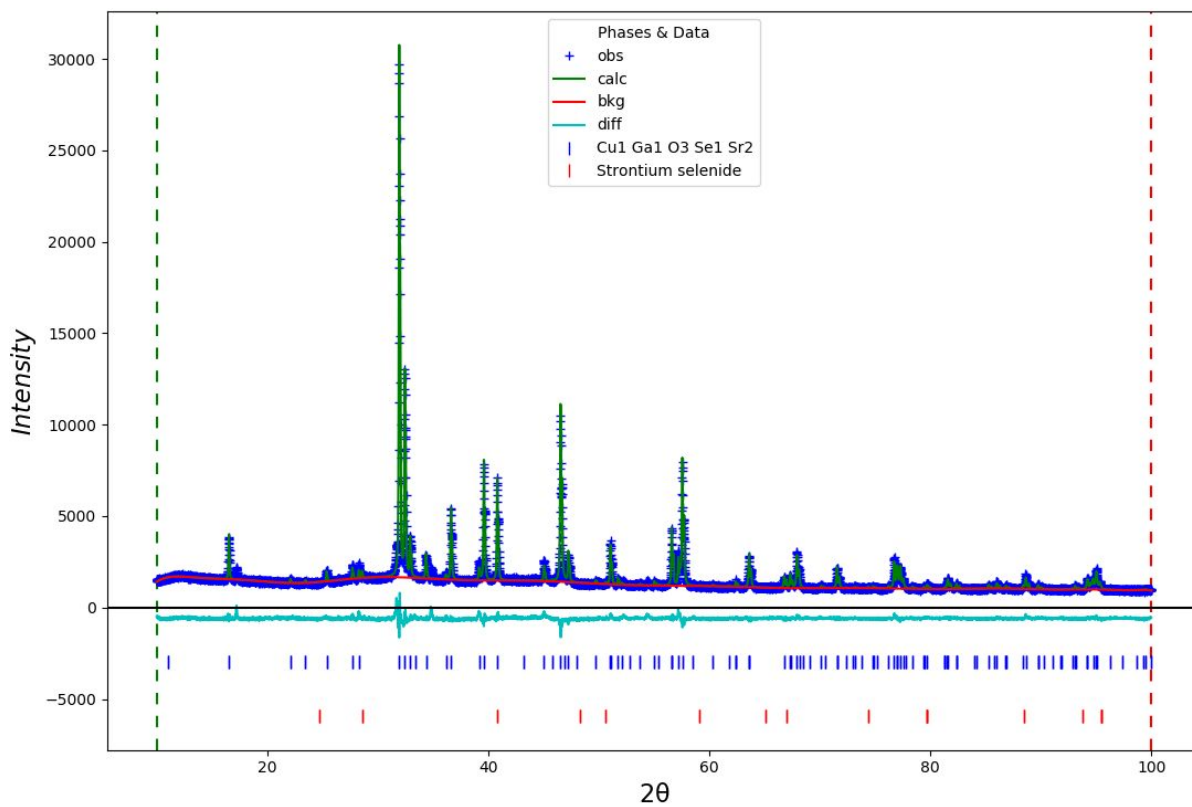

Figure S13. Refinement of sodium doped nominal  $\text{Na}_{0.05}\text{Sr}_{1.95}\text{GaO}_3\text{CuSe}$

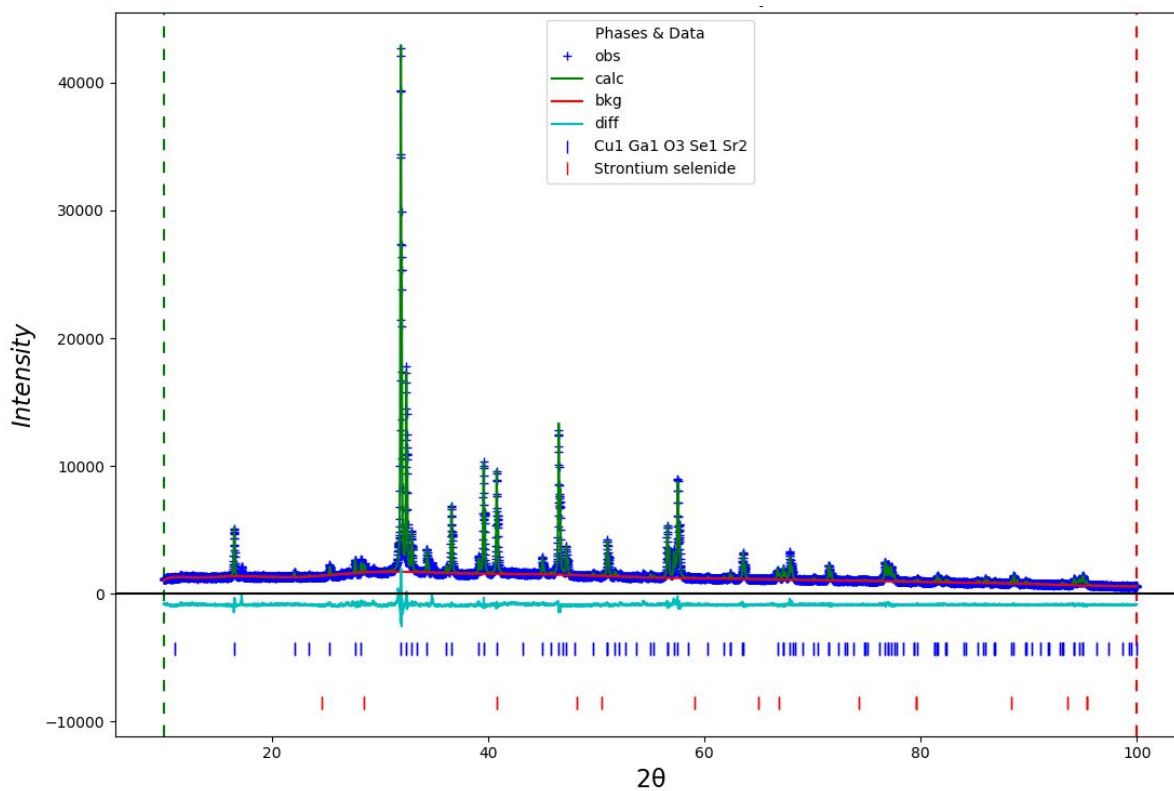

Figure S14. Refinement of potassium doped nominal  $\text{K}_{0.05}\text{Sr}_{1.95}\text{GaO}_3\text{CuSe}$

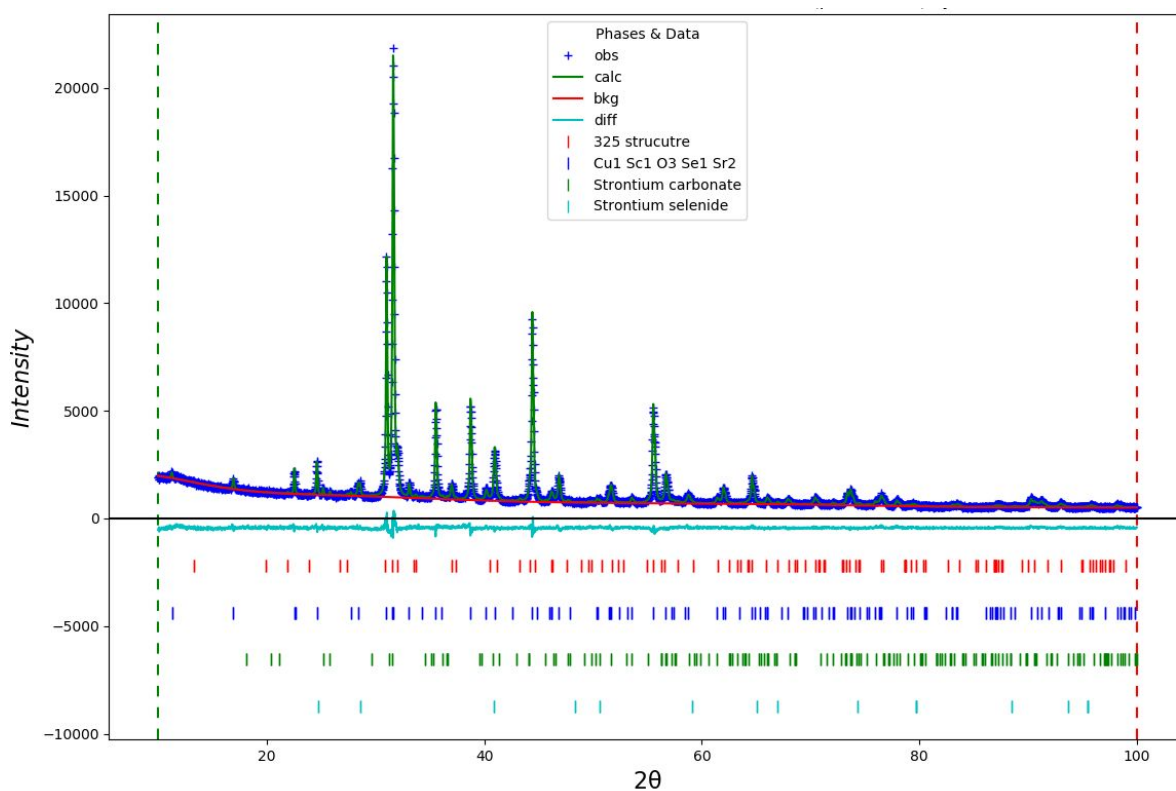

Figure S15. Refinement of sodium doped nominal  $\text{Na}_{0.05}\text{Sr}_{1.95}\text{ScO}_3\text{CuSe}$ .

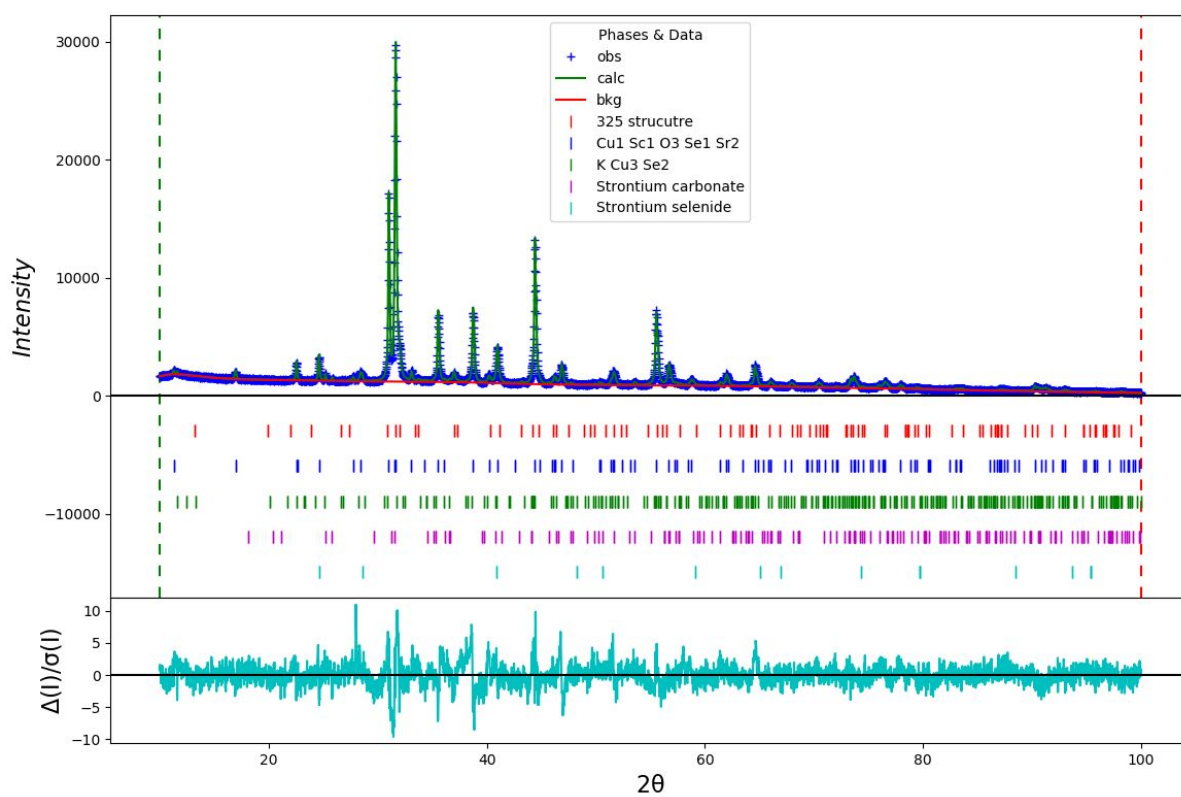

Figure S16. Refinement of potassium doped nominal  $\text{K}_{0.05}\text{Sr}_{1.95}\text{ScO}_3\text{CuSe}$ .

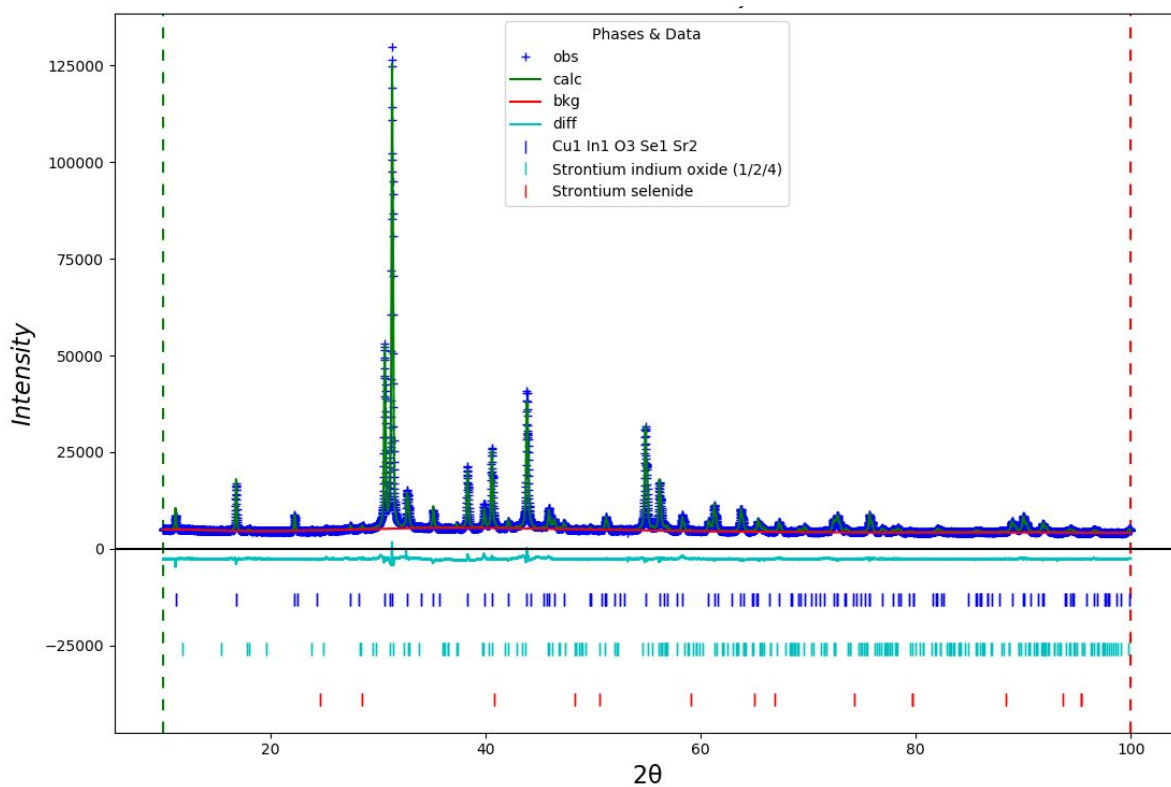

Figure S17. Refinement of sodium doped nominal  $\text{Na}_{0.05}\text{Sr}_{1.95}\text{InO}_3\text{CuSe}$ .

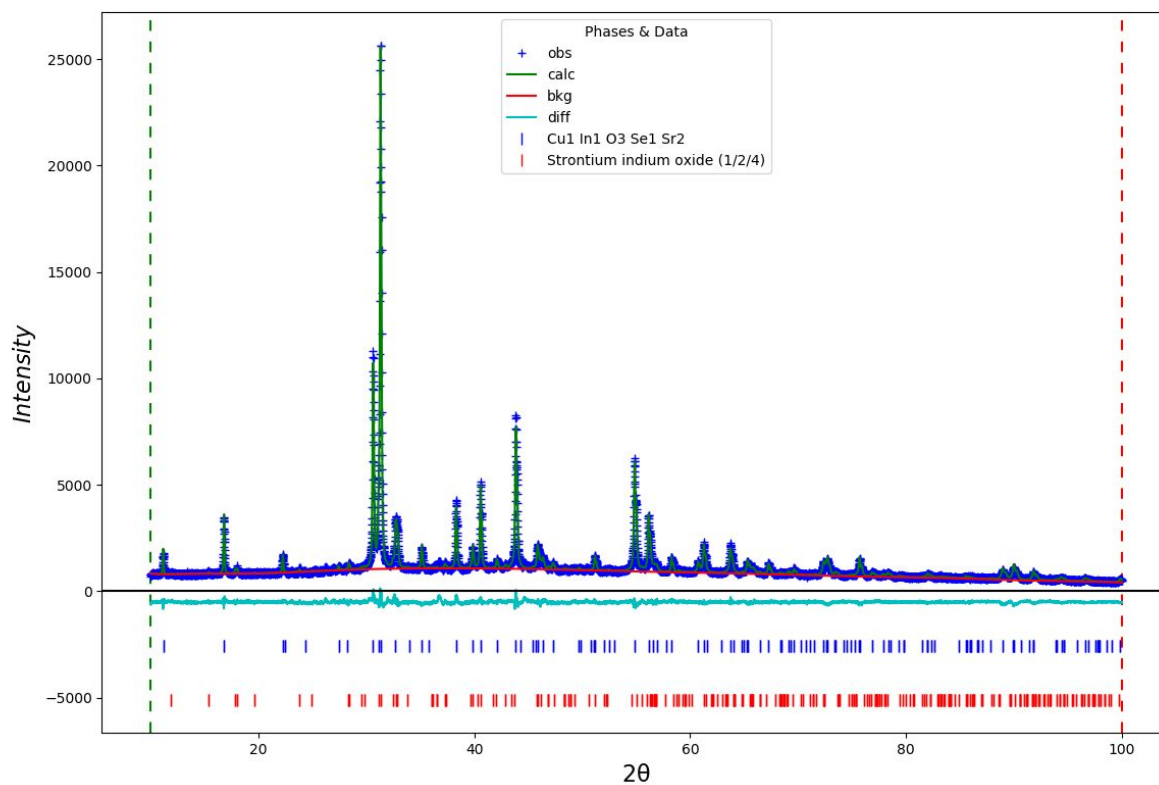

Figure S18. Refinement of potassium doped nominal  $\text{K}_{0.05}\text{Sr}_{1.95}\text{InO}_3\text{CuSe}$ .

| Sample                                                    | Band Gap / eV | Results of refinement                                                                                                                                                    |
|-----------------------------------------------------------|---------------|--------------------------------------------------------------------------------------------------------------------------------------------------------------------------|
| $\text{Sr}_2\text{GaO}_3\text{CuS}$                       | 2.43          | wRp = 3.16%. 99.1 wt% main phase; 0.3 wt% SrS; 0.6wt% $\text{Sr}_3\text{Ga}_2\text{O}_6$                                                                                 |
| $\text{Na}_{0.05}\text{Sr}_{1.95}\text{GaO}_3\text{CuS}$  | 2.42          | wRp = 3.62%. 98.1 wt% main phase; 0.3 wt% SrS ; 1.6 wt% $\text{Sr}_3\text{Ga}_2\text{O}_6$                                                                               |
| $\text{K}_{0.05}\text{Sr}_{1.95}\text{GaO}_3\text{CuS}$   | 2.43          | wRp 3.40%. 98.0 wt% main; 0.1 wt% SrS; 1.7 wt% $\text{Sr}_3\text{Ga}_2\text{O}_6$ ; 0.7 wt% $\text{KCu}_7\text{S}_4$                                                     |
| $\text{Sr}_2\text{ScO}_3\text{CuS}$                       | 3.15          | wRp = 3.71%. 99.4 wt% main; 0.6 wt% $\text{SrSO}_4$                                                                                                                      |
| $\text{Na}_{0.05}\text{Sr}_{1.95}\text{ScO}_3\text{CuS}$  | 3.08          | wRp = 5.01%. 83.1 wt% main; 0.8 wt% SrS; 13.7wt % $\text{Sr}_3\text{Sc}_2\text{O}_5\text{Cu}_2\text{S}_2$ ; 2.3wt % $\text{SrCO}_3$ .                                    |
| $\text{K}_{0.05}\text{Sr}_{1.95}\text{ScO}_3\text{CuS}$   | 3.11          | wRp = 4.34%. 90.9 wt% main; 0.8 wt% SrS; 6.5 wt% $\text{Sr}_3\text{Sc}_2\text{O}_5\text{Cu}_2\text{S}_2$ ; 1.8w% $\text{SrCO}_3$                                         |
| $\text{Sr}_2\text{InO}_3\text{CuS}$                       | 2.29          | wRp = 2.81%. 95.2 wt% main; 0.8 wt% SrS; 4 wt% $\text{SrIn}_2\text{O}_4$                                                                                                 |
| $\text{Na}_{0.05}\text{Sr}_{1.95}\text{InO}_3\text{CuS}$  | 2.24          | wRp = 3.57%. 83.1% main phase; 2.2 wt% SrS; 13.3 wt% $\text{SrIn}_2\text{O}_4$ ; <b>1.5 wt% Cu</b>                                                                       |
| $\text{K}_{0.05}\text{Sr}_{1.95}\text{InO}_3\text{CuS}$   | 2.26          | wRp = 4.59%. 84.8% main phase; 3.2% SrS; 10.1% $\text{SrIn}_2\text{O}_4$ ; <b>1.8% Cu</b>                                                                                |
| $\text{Sr}_2\text{GaO}_3\text{CuSe}$                      | 1.85          | wRp = 3.3%. 97wt% main; 3 wt% $\text{Sr}_3\text{Ga}_2\text{O}_6$                                                                                                         |
| $\text{Na}_{0.05}\text{Sr}_{1.95}\text{GaO}_3\text{CuSe}$ | 1.86          | wRp = 4.6%. 99.1 wt% main; 0.4 wt% SrSe; 0.5 wt% $\text{SrGa}_2\text{O}_4$                                                                                               |
| $\text{K}_{0.05}\text{Sr}_{1.95}\text{GaO}_3\text{CuSe}$  | 1.85          | wRp = 4.75%. 99.4 wt% main; 0.6 wt% SrSe                                                                                                                                 |
| $\text{Sr}_2\text{ScO}_3\text{CuSe}$                      | 2.95          | wRp = 3.23%. 98.5 wt% main; 1.2 wt% $\text{Sr}_3\text{Sc}_2\text{O}_5\text{Cu}_2\text{Se}_2$ ; 0.3 w% SrSe.                                                              |
| $\text{Na}_{0.05}\text{Sr}_{1.95}\text{ScO}_3\text{CuSe}$ | 2.88          | wRp = 4.1%. 90.3 wt% main; 8.2 wt% $\text{Sr}_3\text{Sc}_2\text{O}_5\text{Cu}_2\text{Se}_2$ ; 0.5 wt% SrSe; 1 wt% $\text{SrCO}_3$                                        |
| $\text{K}_{0.05}\text{Sr}_{1.95}\text{ScO}_3\text{CuSe}$  | 2.94          | wRp = 4.62%; 90.3 wt% main; 8.0 wt% $\text{Sr}_3\text{Sc}_2\text{O}_5\text{Cu}_2\text{Se}_2$ ; 0.3 wt% SrSe; 1.1 wt% $\text{SrCO}_3$ ; 0.3 wt% $\text{KCu}_3\text{Se}_2$ |
| $\text{Sr}_2\text{InO}_3\text{CuSe}$                      | 1.88          | wRp = 4.01%. 96.5% wt% main; 1.5 wt% SrSe; 2 wt% $\text{SrIn}_2\text{O}_4$                                                                                               |
| $\text{Na}_{0.05}\text{Sr}_{1.95}\text{InO}_3\text{CuSe}$ | 1.87          | wRp = 3.04%. 95.2 wt% main; 0.2 wt% SrSe; 4.6 wt% $\text{SrIn}_2\text{O}_4$                                                                                              |
| $\text{K}_{0.05}\text{Sr}_{1.95}\text{InO}_3\text{CuSe}$  | 1.84          | wRp = 4.76%. 86.3 wt% main; 13.7 wt% $\text{SrIn}_2\text{O}_4$                                                                                                           |

Table S12. Summary of the band gaps and refinements on the doped layered oxychalcogenide phases. Data for undoped samples also provided.

## References

- (1) Zhu, W. J.; Hor, P. H.  $\text{Sr}_2\text{CuGaO}_3\text{S}$ , a Rare Example of Square Pyramidal Gallium. *Inorg. Chem.* **1997**, *36* (17), 3576-3577. DOI: 10.1021/ic970322c.
- (2) Ogino, H.; Shimoyama, J.; Kishio, K.; Katsura, Y.; Tsuboi, M.; Yamanoi, K.; Cadatal-Raduban, M.; Nakazato, T.; Shimizu, T.; Sarukura, N. Excitonic luminescence in two-dimensionally confined layered sulfide oxides. *Appl. Phys. Lett.* **2012**, *101* (19), Article. DOI: 10.1063/1.4764941.
- (3) He, X.; Cho, T.; Katase, T.; Hanzawa, K.; Kitani, S.; Hiramatsu, H.; Hosono, H.; Kamiya, T. Wide-Gap p-Type Layered Oxychalcogenides  $\text{AE}_2\text{CuInO}_3\text{Ch}$  (AE: Alkaline Earth; Ch: Chalcogen): Unusually Low Residual Carrier Concentration and Green-to-Red Emission. *Chem. Mater.* **2024**. DOI: 10.1021/acs.chemmater.4c00724.
